# Supplementary material for: MRI-Based Texture Features as Potential Prognostic Biomarkers in Anaplastic Astrocytoma Patients Undergoing Surgical Treatment
Source: Hindawi journal article supplement (doi:10.1155/2020/2126768), 2020-06-12
Supplement: f1 [file 2126768.f1.pdf]

**Supplementary material 1:** Explanations and formulas of texture parameters.

Texture parameters from Histogram-based matrix (HISTO):

| Parameter      | Description                                                            | Formula                                                                                                                                      |
|----------------|------------------------------------------------------------------------|----------------------------------------------------------------------------------------------------------------------------------------------|
| HISTO-Skewness | Asymmetry of the grey-level distribution in the histogram              | $HISTO\_Skewness = \frac{\frac{1}{E} \sum_i (HISTO(i) - \overline{HISTO})^3}{(\sqrt{\frac{1}{E} \sum_i (HISTO(i) - \overline{HISTO})^2})^3}$ |
| HISTO-Kurtosis | Shape of the grey-level distribution relative to a normal distribution | $HISTO\_Kurtosis = \frac{\frac{1}{E} \sum_i (HISTO(i) - \overline{HISTO})^4}{(\frac{1}{E} \sum_i (HISTO(i) - \overline{HISTO})^2)^2}$        |
| HISTO-Entropy  | Randomness of the distribution                                         | $HISTO\_Entropy_{log10} = - \sum_i p(i) \cdot \log_{10}(p(i) + \varepsilon)$                                                                 |
| HISTO-Energy   | Uniformity of the distribution                                         | $HISTO\_Energy = \sum_i p(i)^2$                                                                                                              |

$E$ : the total number of voxels in the Volume of Interest;  $HISTO(i)$ : the number of voxels with intensity  $I$ ;  $\overline{HISTO}$ : the average of grey-levels in the histogram;  $p(i)$ : the probability of occurrence of voxels with intensity  $I$ ;  $\varepsilon = 2e - 16$ ;  $V_i$ : the volume of voxel  $i$  of the Volume Of Interest.

Texture parameters from grey level co-occurrence matrix (GLCM):

| Parameter          | Description                              | Formula                                                                                                                                               |
|--------------------|------------------------------------------|-------------------------------------------------------------------------------------------------------------------------------------------------------|
| GLCM-Homogeneity   | Homogeneity of grey-level voxel pairs    | $GLCM_{Homogeneity} = \text{Average over 13 directions}(\sum_i \sum_j \frac{GLCM(i,j)}{1 +  i - j })$                                                 |
| GLCM-Energy        | Uniformity of grey-level voxel pairs     | $GLCM_{Energy} = \text{Average over 13 directions}(\sum_i \sum_j GLCM(i,j)^2)$                                                                        |
| GLCM-Contrast      | Local variations in the GLCM             | $GLCM_{Contrast} = \text{Average over 13 directions}(\sum_i \sum_j (i - j)^2 \cdot GLCM(i,j))$                                                        |
| GLCM-Correlation   | Linear dependency of grey-levels in GLCM | $GLCM_{Correlation} = \text{Average over 13 directions}(\sum_i \sum_j \frac{(i - \mu_i) \cdot (j - \mu_j) \cdot GLCM(i,j)}{\sigma_i \cdot \sigma_j})$ |
| GLCM-Entropy       | Randomness of grey-level voxel pairs     | $GLCM_{Entropy_{log10}} = \text{Average over 13 directions}(-\sum_i \sum_j GLCM(i,j) \cdot \log_{10}(GLCM(i,j) + \epsilon))$                          |
| GLCM-Dissimilarity | Variation of grey-level voxel pairs      | $GLCM_{Dissimilarity} = \text{Average over 13 directions}(\sum_i \sum_j  i - j  \cdot GLCM(i,j))$                                                     |

$I(p, q)$  corresponds to voxel( $p, q$ ) in an image ( $I$ ) of size  $N \times M$ ;  $Pairs_{ROI}$  corresponds to the number of all voxel pairs belonging to the region of interest (ROI);  $\mu_i$ : the average on row  $i$ ;  $\mu_j$ : the average on column  $j$ ;  $\sigma_i$ : the variance on row  $i$ ;  $\sigma_j$ : the variance on column  $j$ ;  $\epsilon = 2e - 16$ .

$$GLCM_{\Delta x, \Delta y}(i, j) = \frac{1}{Pairs_{ROI}} \sum_{p=1}^{N-\Delta x} \sum_{q=1}^{M-\Delta y} \begin{cases} 1 & \text{if } (I(p, q) = i, I(p + \Delta x, q + \Delta y) = j) \\ & \text{and } I(p, q), I(p + \Delta x, q + \Delta y) \in ROI \\ 0 & \text{otherwise} \end{cases}$$
